# Supplementary material for: FAN1, a DNA Repair Nuclease, as a Modifier of Repeat Expansion Disorders
Source: PubMed Central journal article supplement — J Huntingtons Dis. 2021 Feb 9;10(1):95–122. doi: 10.3233/JHD-200448 (PMC7990447; doi:10.3233/jhd-200448), 2021-02-09
Supplement: jhd-10-jhd200448-s001.pdf [file jhd-10-jhd200448-s001.pdf]

# Supplementary Material

## FAN1, a DNA Repair Nuclease, as a Modifier of Repeat Expansion Disorders

**Supplementary Table 1.** *FAN1* mutations associated with KIN

| Sr No. | Nucleotide alteration | Protein Change | Exon/Intron | State        | Reference |
|--------|-----------------------|----------------|-------------|--------------|-----------|
| 1      | c.1234+2T>A           | Splice site    | 2           | Heterozygous | [1]       |
|        | c.2036_7delGA         | p.R679Tfs*5    | 7           |              |           |
| 2      | c.1234+2T>A           | Splice site    | 2           | Heterozygous | [1]       |
|        | c.2245C>T             | p.R749*        | 9           |              |           |
| 3      | c.1375+1G>A           | Splice site    | 3           | Heterozygous | [1]       |
|        | c.2616delA            | p.R873T*17     | 12          |              |           |
| 4      | c.1606c>T             | p.R536*        | 5           | Heterozygous | [1]       |
|        | c.2786A>C             | p.Q929P        | 12          |              |           |
| 5      | c.1606c>T             | p.R536*        | 5           | Heterozygous | [1]       |
|        | c.2878G>A             | p.D960N        | 13          |              |           |
| 6      | c.2120G>A             | p.W707*        | 8           | Homozygous   | [1]       |
| 7      | c.2616delA            | p.D873T*17     | 12          | Homozygous   |           |
| 8      | c.2611T>C             | p.C871R        | 12          | Heterozygous | [1]       |
|        | c.2878G>A             | p.D960N        | 13          |              |           |
| 9      | c.2774_5delTT         | p.L925Pfs*25   | 12          | Heterozygous | [1]       |
|        | c.2810G>A             | p.G937D        | 13          |              |           |
| 10     | c.1102C>T             | p.N368*        | 2           | Heterozygous | [2]       |
|        | c.2616delA            | p.D873Tfs*17   | 12          |              |           |
| 12     | c.2590C>T             | p.E864*        | 12          | Heterozygous | [3]       |
|        | c.2774_5delTT         | p.L925Pfs*25   | 12          |              |           |
| 13     | c.1899del             | p.C633Wfs*9    | 6           | Homozygous   | [4]       |
| 14     | c.1520G>A             | p.R507H        | 4           | Heterozygous | [5]       |
| 15     | c.1369C>T             | p.Q457*        | 4           | Heterozygous | [6]       |
|        | c.1356T>G             | p.N452K        | 4           |              |           |

Nomenclature for variants are used as described in [7].

**Supplementary Table 2. *FANI* Variants**

(Summary of *FANI* variants in various diseases. These variants do not necessarily lead to disease)

| Sr No.                      | Variant     | Amino acid change | Diseases                         | Reference |
|-----------------------------|-------------|-------------------|----------------------------------|-----------|
| <b>Missense mutations</b>   |             |                   |                                  |           |
| 1                           | rs148404807 | p.M50R            | CRC, Pancreatic Cancer           | [8]       |
| 2                           | rs148404807 | p.M50T            | ASD, SCZ                         | [9]       |
| 3                           | rs761776412 | p.D140Y           | CRC                              | [10]      |
| 4                           | rs771206220 | p.P340S           | CRC                              | [10]      |
| 5                           | rs151322829 | p.R377W           | HD, Breast cancer                | [11,12]   |
| 6                           | rs201153099 | p.L395P           | ASD                              | [9]       |
| 7                           | rs150393409 | p.R507H           | Breast cancer, ASD, SCZ, HD      | [9,11,12] |
| 8                           |             | p.K505I           | ASD                              | [9]       |
| 9                           | rs377418523 | p.R591W           | CRC                              | [10]      |
| 10                          | rs144081053 | p.P654L           | ASD                              | [9]       |
| 11                          | rs200818425 | p.R658Q           | ASD                              | [9]       |
| 12                          | rs145610507 | p.K794R           | ASD                              | [9]       |
| <b>Nonsense mutation</b>    |             |                   |                                  |           |
| 13                          |             | p.S18*            | Breast and ovarian cancer        | [13]      |
| 14                          |             | p.C47*            | CRC                              | [13]      |
| 15                          |             | p.S258*           | Breast and ovarian cancer        | [13]      |
| 16                          |             | p.S466*           | Breast and ovarian cancer        | [13]      |
| 17                          |             | p.R536*           | KIN, Breast and ovarian cancer   | [1,13]    |
| 18                          |             | p.R706*           | Breast and ovarian cancer        | [13]      |
| 19                          |             | p.R710*           | Breast and ovarian cancer        | [13]      |
| 20                          |             | p.R952*           | Breast, ovarian and other cancer | [10,13]   |
| <b>Frame shift mutation</b> |             |                   |                                  |           |
| 21                          |             | p.K11G fs*45      | Breast and ovarian cancer        | [13]      |
| 22                          |             | p.K11S fs*45      | Breast and ovarian cancer        | [13]      |
| 23                          |             | p.T187S fs*       | Breast and ovarian cancer        | [13]      |
| 24                          |             | p.V308Cfs*5       | Breast, ovarian and other cancer | [13]      |
| 25                          |             | p.E320Gfs*28      | CRC                              | [13]      |
| 26                          |             | p.S323Ifs*3       | Breast and ovarian cancer        | [13]      |
| 27                          |             | p.R679T fs*5      | Breast and ovarian cancer        | [13]      |
| 28                          |             | p.D873TFS*17      | CRC                              | [2,13]    |
| <b>Non-Coding</b>           |             |                   |                                  |           |
| 29                          | rs4779794   | Non-Coding        | BPD/SCZ/MDD                      | [14]      |
| 30                          | rs7171212   | Non-Coding        | BPD/SCZ                          | [14]      |
| 31                          | rs4779796   | Non-Coding        | SCZ                              | [14]      |
| <b>CNV</b>                  |             |                   |                                  |           |
| 32                          |             | 15q13.2           | ASD, SCZ and KIN                 | [9,15,16] |
| 33                          |             | 15q13.3           | ASD, SCZ and KIN                 | [9,15,16] |

ASD, Autism spectrum disorder; SCZ, Schizophrenia; KIN, Karyomegalic interstitial nephritis; CRC, Colorectal cancer; BPD, Bipolar disorder; MDD, Major depressive disorder; HD, Huntington's disease.

## REFERENCES

- [1] Zhou W, Otto EA, Cluckey A, Airik R, Hurd TW, Chaki M, et al. FAN1 mutations cause karyomegalic interstitial nephritis, linking chronic kidney failure to defective DNA damage repair. *Nat Genet.* 2012;44(8):910–5.
- [2] Dash J, Saudan P, Paoloni-Giacobino A, Moll S, De Seigneux S. Case report: A 58-year-old man with small kidneys and elevated liver enzymes. *BMC Nephrol.* 2020;21(1):107.
- [3] Murray SL, Connaughton DM, Fennelly NK, Kay EW, Dorman A, Doyle B, et al. Karyomegalic interstitial nephritis: cancer risk following transplantation. *Nephron.* 2020;144(1):49–54.
- [4] Law S, Gillmore J, Gilbertson JA, Bass P, Salama AD. Karyomegalic interstitial nephritis with a novel FAN1 gene mutation and concurrent ALECT2 amyloidosis. *BMC Nephrol.* 2020;21(1):74.
- [5] Bastarache L, Hughey JJ, Hebring S, Marlo J, Zhao W, Ho WT, et al. Phenotype risk scores identify patients with unrecognized mendelian disease patterns. *Science.* 2018;359(6381):1233–9.
- [6] Koshy P, Sudhakar D, Anupama S, Mathew M, Parthasarthy R, Thangaraj K, et al. Novel homozygous FAN1 mutation in a familial case of karyomegalic interstitial nephritis. *Indian J Nephrol.* 2020;30(4):283–5.
- [7] Den Dunnen JT, Antonarakis E. Nomenclature for the description of human sequence variations. *Hum Genet.* 2001;109(1):121–4.
- [8] Smith AL, Alirezaie N, Connor A, Chan-Seng-Yue M, Grant R, Selander I, et al. Candidate DNA repair susceptibility genes identified by exome sequencing in high-risk pancreatic cancer. *Cancer Lett.* 2016;370(2):302–12.

- [9] Ionita-Laza I, Xu B, Makarov V, Buxbaum JD, Roos JL, Gogos JA, et al. Scan statistic-based analysis of exome sequencing data identifies FAN1 at 15q13.3 as a susceptibility gene for schizophrenia and autism. *Proc Natl Acad Sci U S A*. 2014;111(1):343–8.
- [10] Seguí N, Mina LB, Lázaro C, Sanz-Pamplona R, Pons T, Navarro M, et al. Germline mutations in FAN1 cause hereditary colorectal cancer by impairing DNA repair. *Gastroenterology*. 2015;149(3):563–6.
- [11] Park DJ, Odefrey FA, Hammet F, Giles GG, Baglietto L, Abcfs, et al. FAN1 variants identified in multiple-case early-onset breast cancer families via exome sequencing: No evidence for association with risk for breast cancer. *Breast Cancer Res Treat*. 2011;130(3):1043–9.
- [12] Lee JM, Correia K, Loupe J, Kim KH, Barker D, Hong EP, et al. CAG repeat not polyglutamine length determines timing of Huntington’s disease onset. *Cell*. 2019;178:887-900.e14.
- [13] Fievet A, Mouret-Fourme E, Colas C, de Pauw A, Stoppa-Lyonnet D, Buecher B. Prevalence of pathogenic variants of FAN1 in more than 5000 patients assessed for genetic predisposition to colorectal, breast, ovarian, or other cancers. *Gastroenterology*. 2019;156(6):1919–20.
- [14] Jian X, Chen J, Li Z, Fahira A, Shao W, Zhou J, et al. Common variants in FAN1, located in 15q13.3, confer risk for schizophrenia and bipolar disorder in Han Chinese. *Prog Neuro-Psychopharmacology Biol Psychiatry*. 2020;103:109973.  
doi:10.1016/j.pnpbp.2020.109973
- [15] Hoppman-Chaney N, Wain K, Seger PR, Superneau DW, Hodge JC. Identification of single gene deletions at 15q13.3: Further evidence that CHRNA7 causes the 15q13.3

microdeletion syndrome phenotype. *Clin Genet.* 2013;83(4):345–51.

- [16] LePichon JB, Bittel DC, Graf WD, Yu S. A 15q13.3 homozygous microdeletion associated with a severe neurodevelopmental disorder suggests putative functions of the TRPM1, CHRNA7, and other homozygously deleted genes. *Am J Med Genet Part A.* 2010;152(5):1300–4.

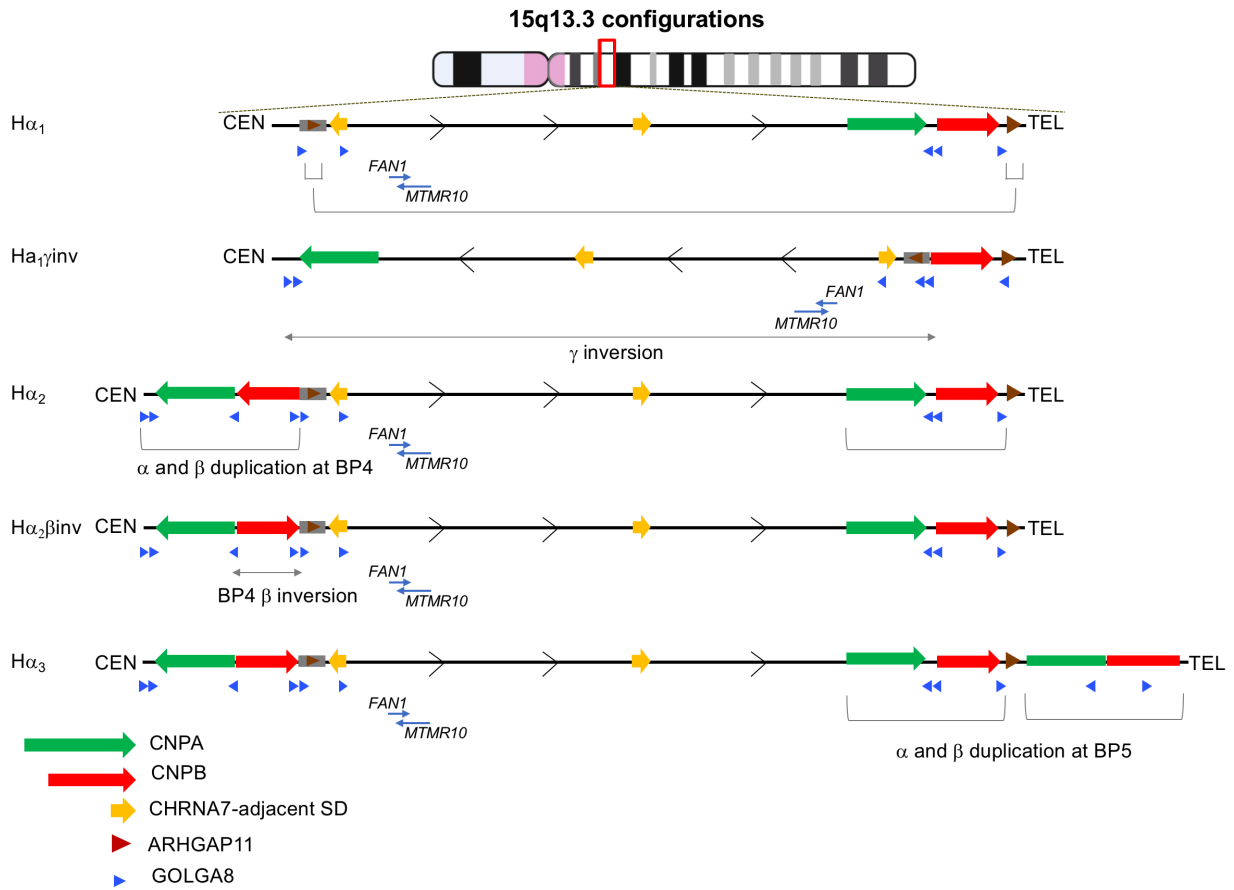

**Supplementary Figure 1.** Different configurations of the human 15q13.3 region. See text for detail.
